# Supplementary material
Source: PubMed Central journal article supplement (PMC8025206)

**Supplemental Figure 1:** Change in relative abundance from baseline to end during the broccoli treatment period within subjects with GSTM1 absent or present. A) Bacteroidetes. B) Firmicutes. C) Ratio of Bacteroidetes relative to Firmicutes. (Mean  $\pm$  SD; n=9 per group.)

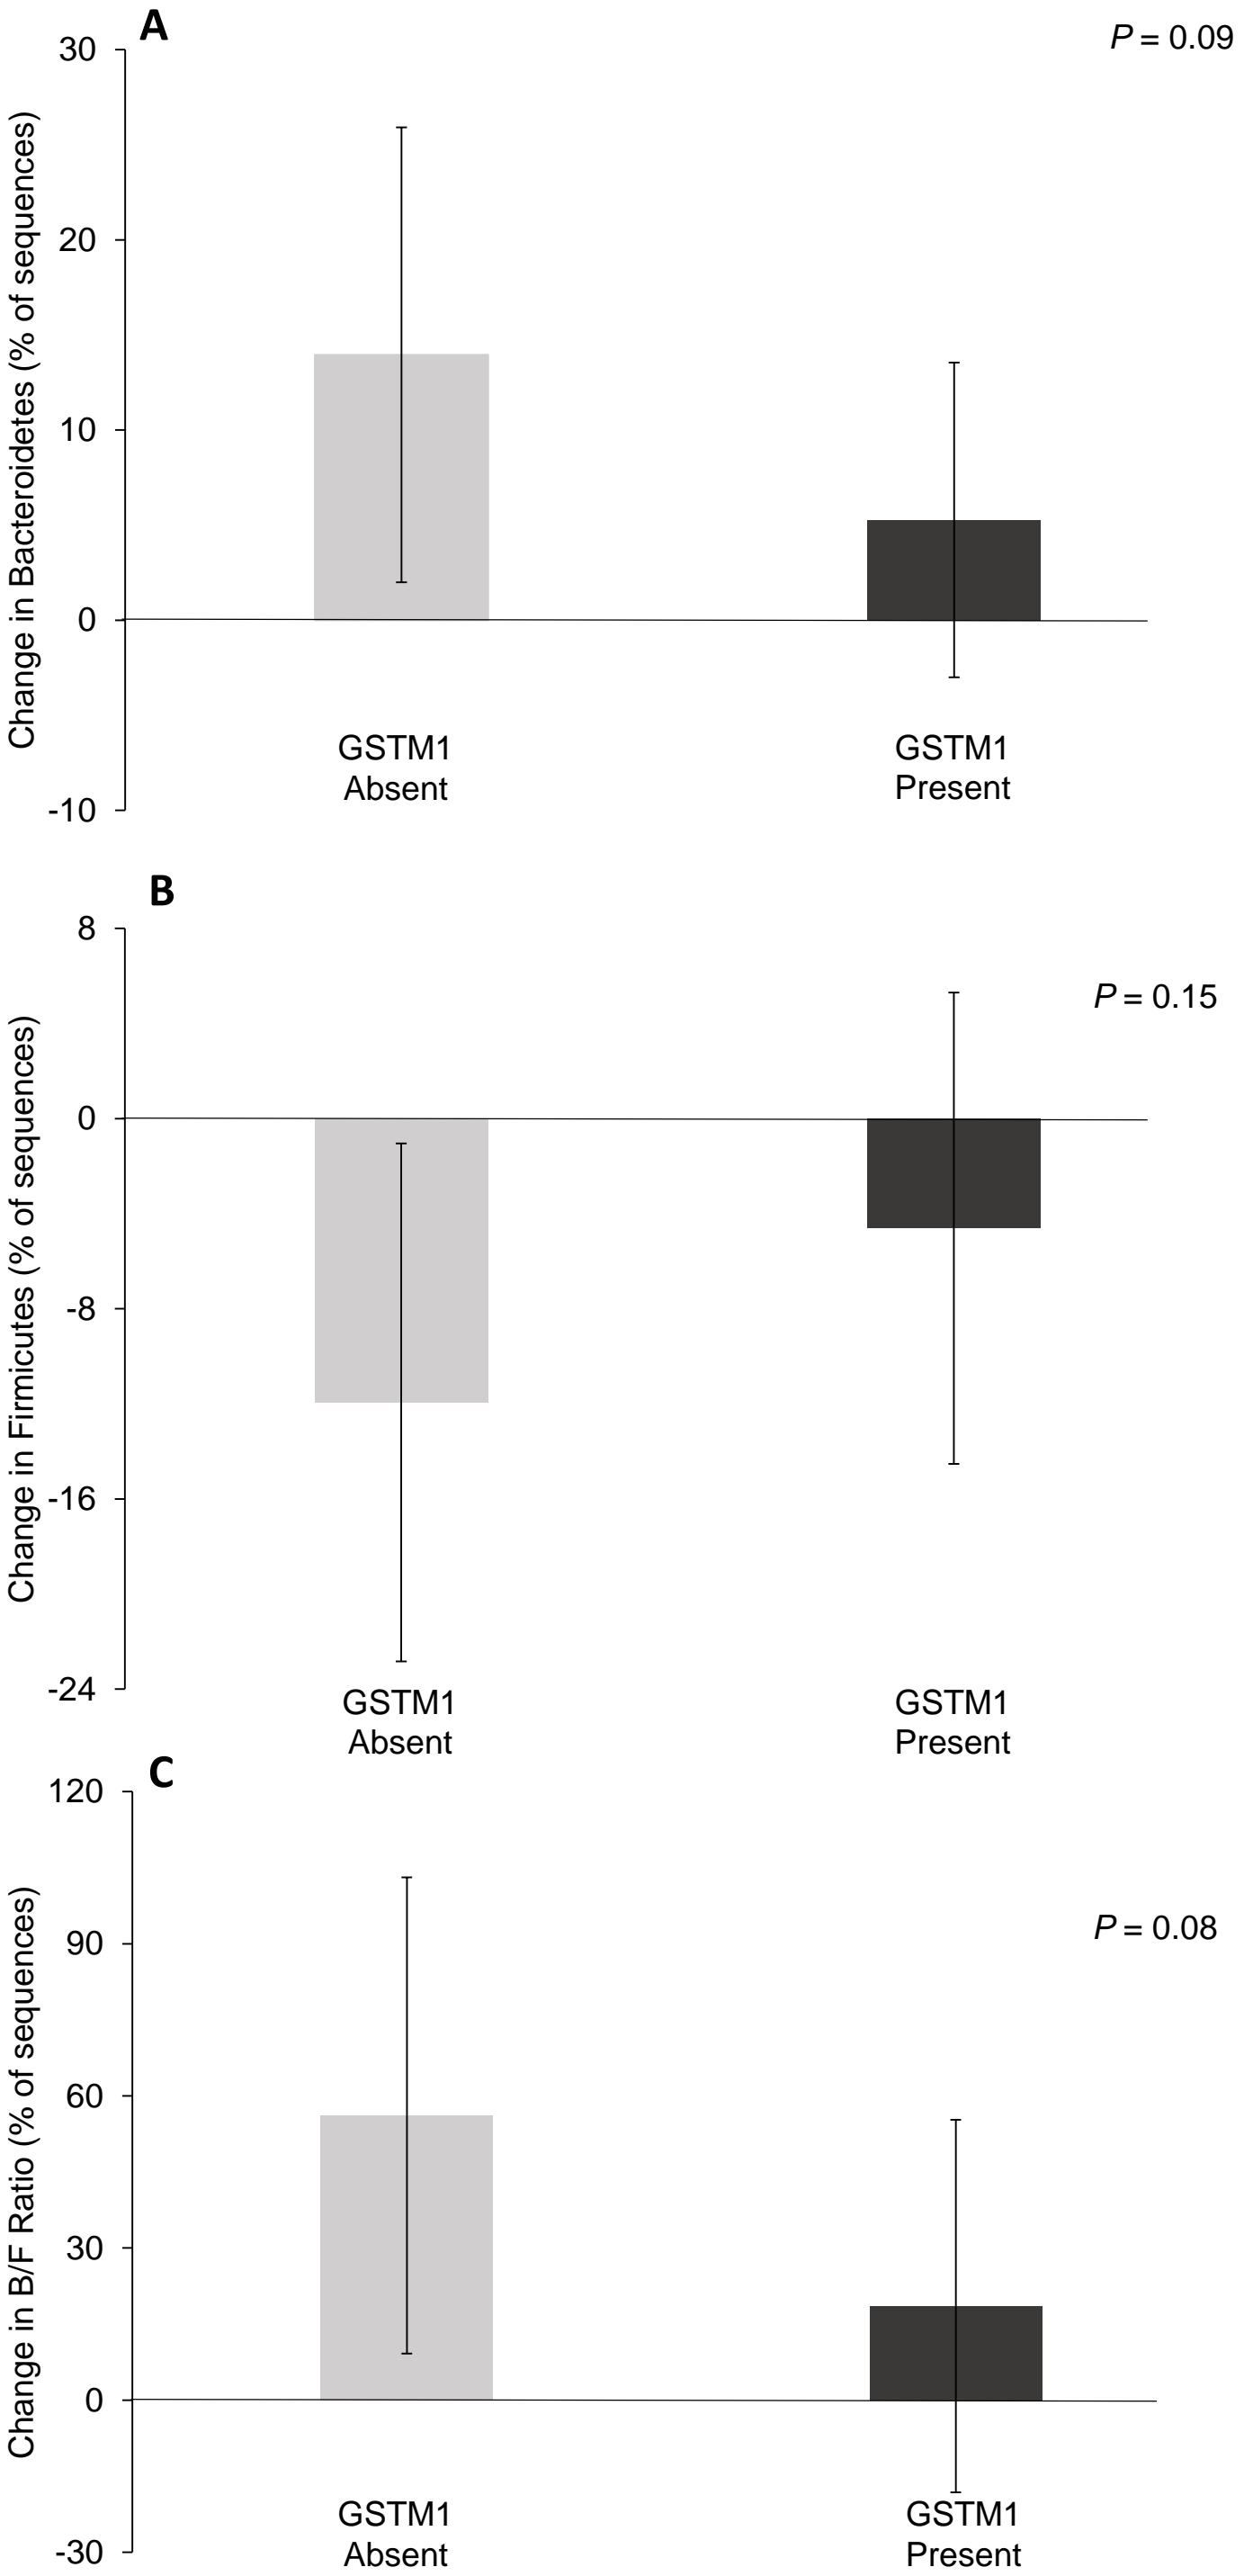

Supplement: NIHMS1509519-supplement-1.pdf [file NIHMS1509519-supplement-1.pdf]
