# Supplementary material
Source: PubMed Central journal article supplement (PMC8025206)

**Supplemental Figure 2:** Change in abundance of *B. thetaiotaomicron* from baseline to end during the broccoli treatment period within subjects with GSTM1 absent or present. (Mean  $\pm$  SD; n=9 per group.)

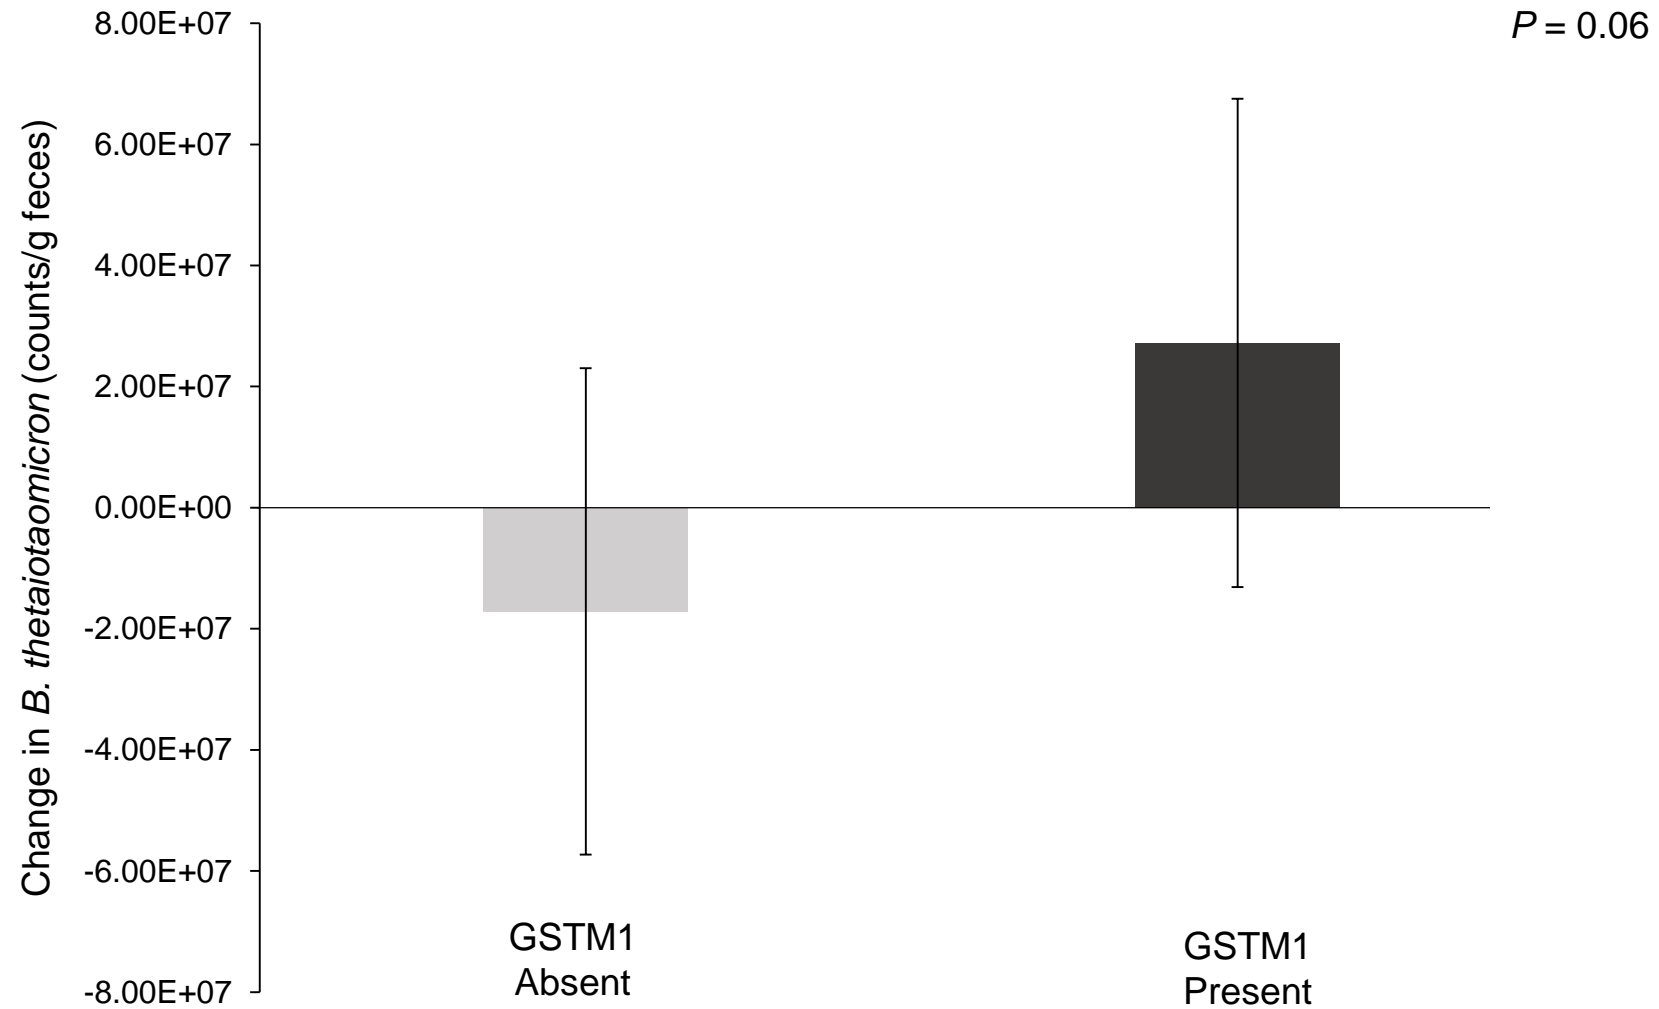

Supplement: NIHMS1509519-supplement-2.pdf [file NIHMS1509519-supplement-2.pdf]
