# Supplementary material
Source: PubMed Central journal article supplement (PMC8025206)

**Supplemental Figure 4:** Change in relative abundance of the *Bacteroides* genus from baseline to end within each treatment period in subjects with BMI < 26 kg/m<sup>2</sup>. (Mean  $\pm$  SD; n=9 per group.)

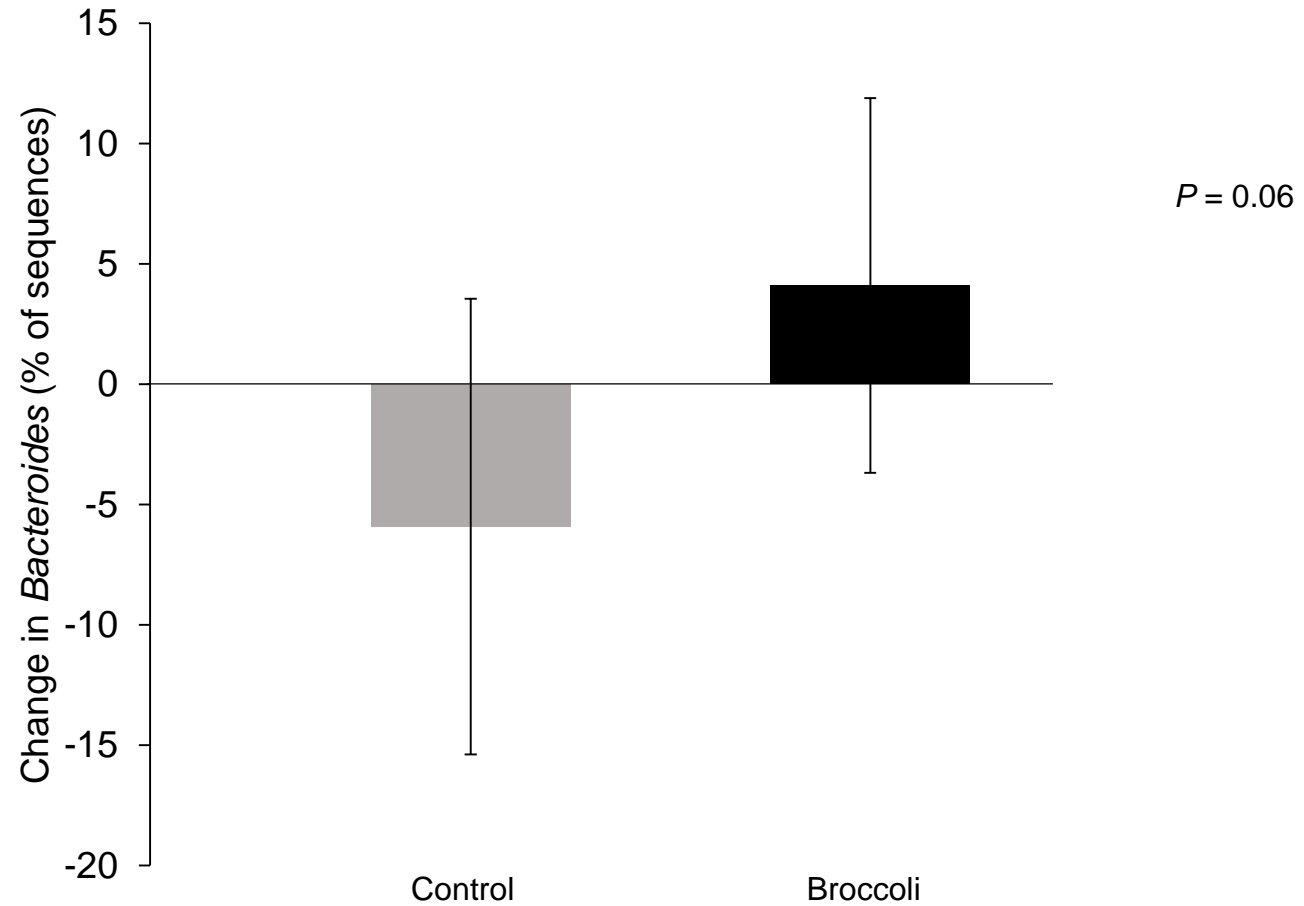

Supplement: NIHMS1509519-supplement-4.pdf [file NIHMS1509519-supplement-4.pdf]
