# Supplementary material
Source: PubMed Central journal article supplement (PMC8025206)

**Supplemental Figure 5:** Change in relative abundance from baseline to end within each treatment period in subjects with BMI > 26 kg/m<sup>2</sup>. A) Bacteroidetes. B) Firmicutes. C) Ratio of Bacteroidetes relative to Firmicutes. (Mean ± SD; n=9 per group.)

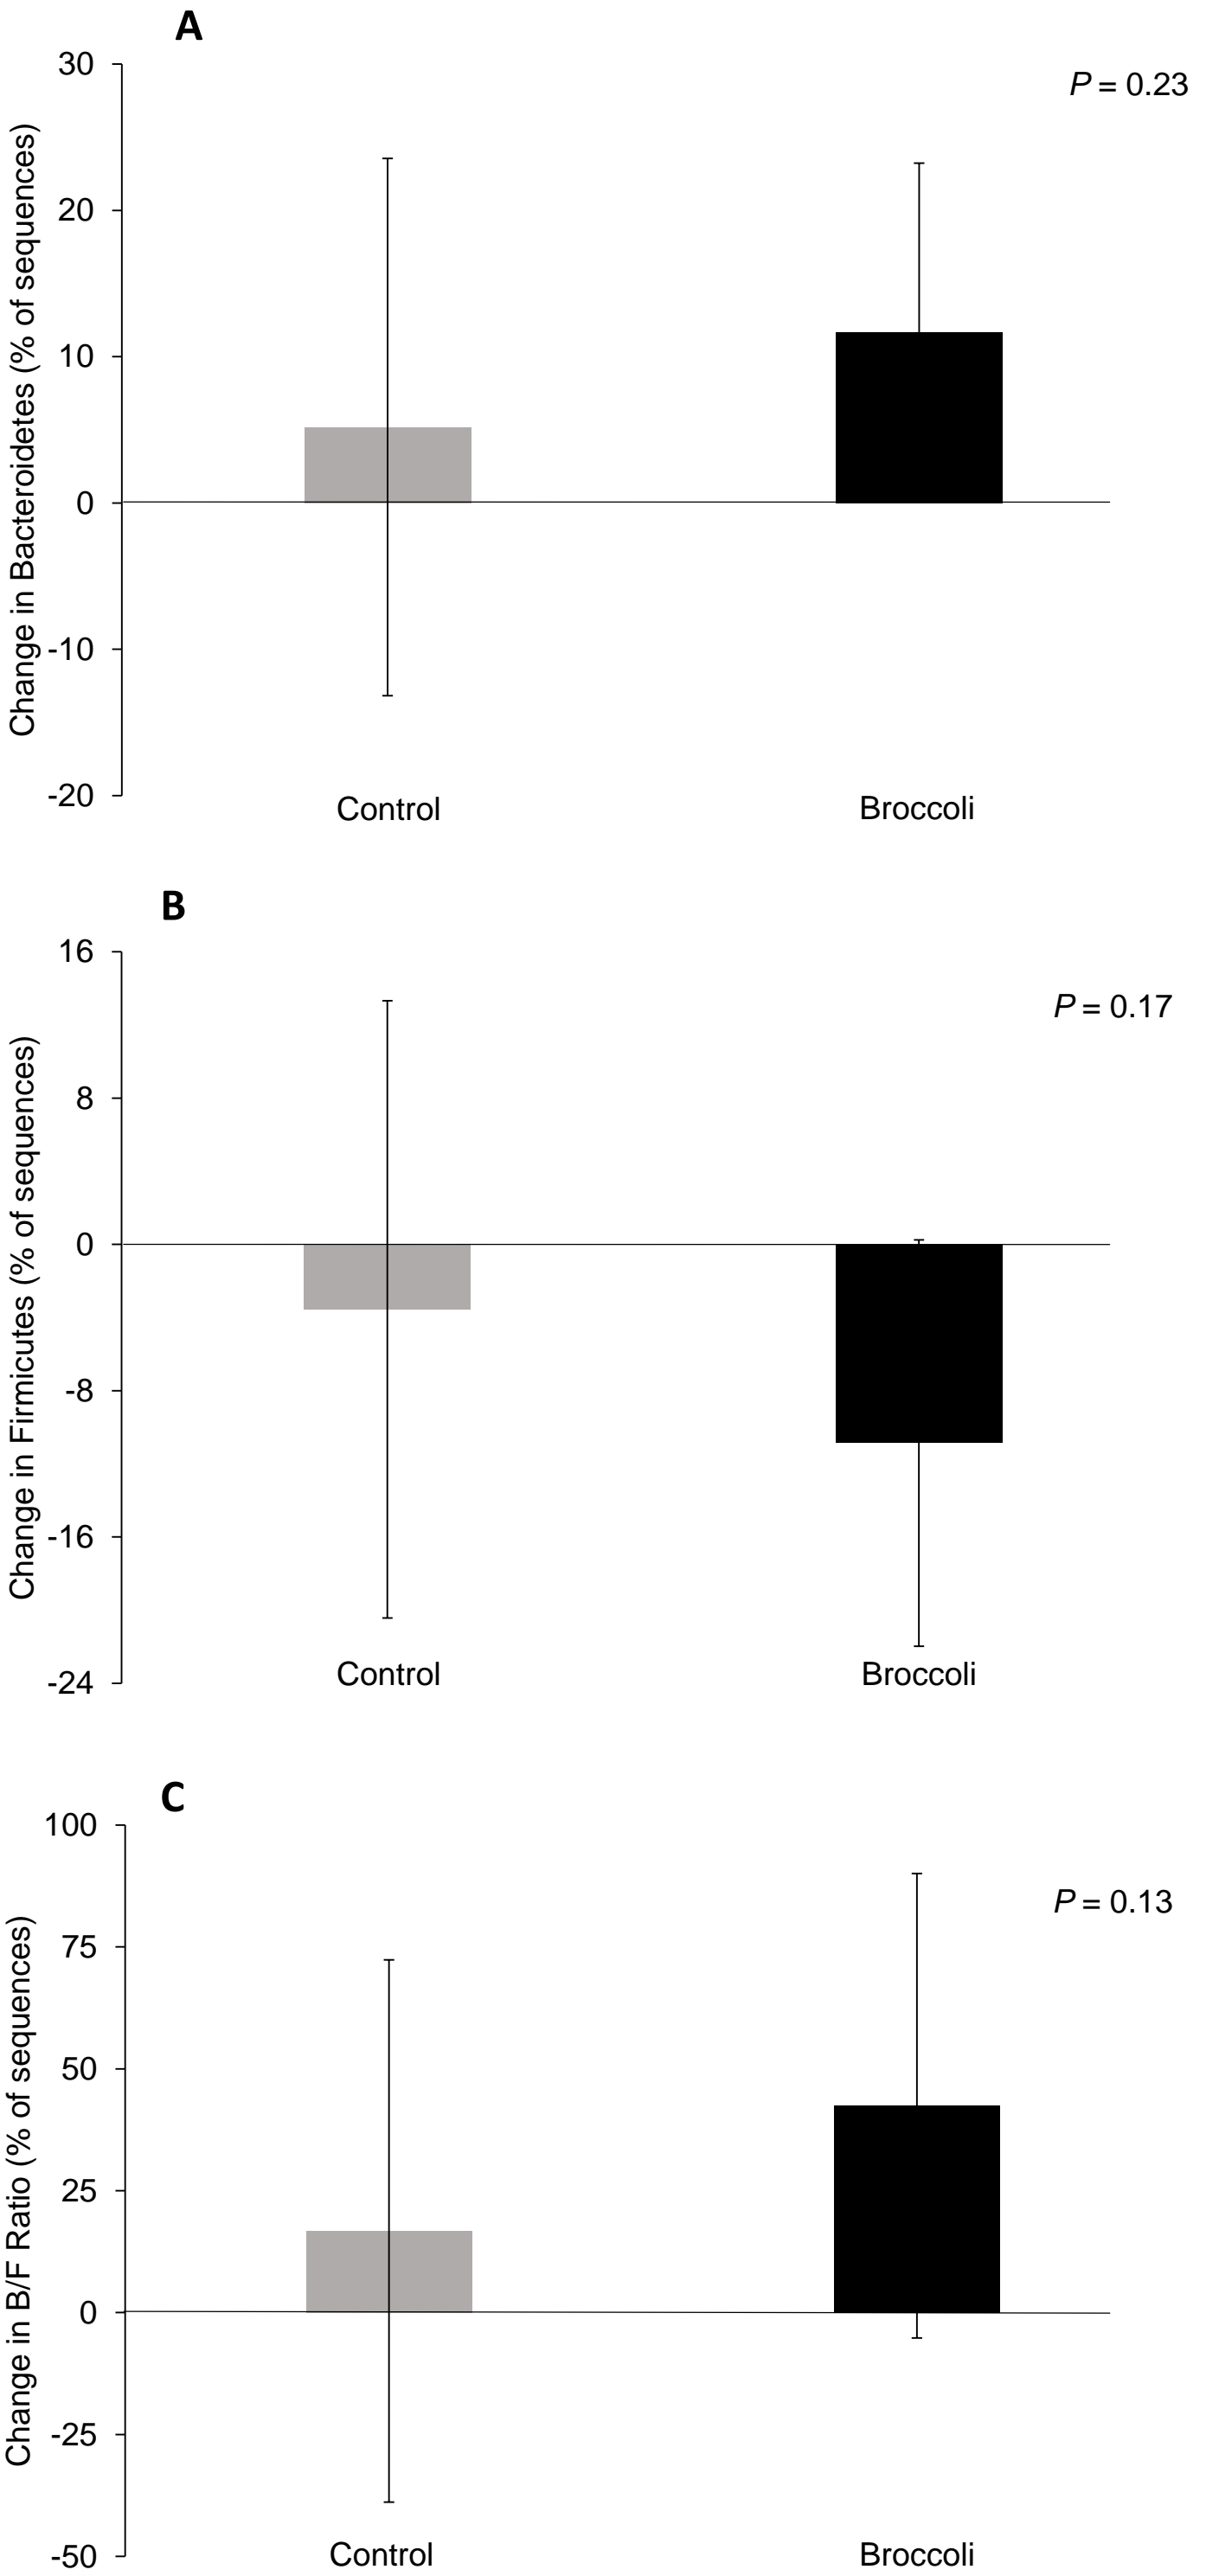

Supplement: NIHMS1509519-supplement-5.pdf [file NIHMS1509519-supplement-5.pdf]
